# Supplementary material
Source: HighWire-hosted journal article supplement (http://www.cmaj.ca/highwire/filestream/59627/field_highwire_adjunct_files/0/151171-res-1-at.pdf)
Supplement: 151171-res-1-at.pdf [file 151171-res-1-at.pdf]

## Appendix 1 (as supplied by the authors): Interview Questions

### *Perceptions of Palliative Care*

- When you think of palliative care, what is it that first comes to mind for you?
- Where did you first hear about palliative care? For example, reading about it in newspapers, talking to family or friends, etc.
- Was palliative care ever discussed between you and your doctor/oncologist?  
When did this take place? What was your reaction? How did you feel?
- How would you suggest that a discussion about palliative care be approached by your doctor/oncologist, if your doctor/oncologist were to discuss this?
- Does the name “palliative care” bother you?  
Do you think the name “palliative care” should be changed? If so, do you have any suggestions?  
\*How do you feel about the name “supportive care” instead of “palliative care”?

### *Intervention – Perceptions of Palliative Care*

- What do you feel others, or the people who are close to you, think palliative care is?  
How do you feel about telling people close to you that you are seeing palliative care?
- Has your impression of what palliative care means changed over the past 4 months? If so, in what way?
- Tell me about your experience with palliative care at Princess Margaret Hospital during the past 4 months.

### **Before completion:**

- Is there anything else that you would like to add? Is there any important issue in your life that we haven't talked about that you would like to share with me?
- How have you felt about taking part in this interview? Is there anything you would like to ask me about the interview?

### **INTERVIEWER NOTES / REFLECTIONS ON INTERVIEW:**
